# Supplementary material for: Dark to bright fluorescence state by inter-connecting fluorophores: concentration-dependent blue to NIR emission and live cell imaging applications
Source: Royal Society of Chemistry journal article supplement (doi:10.1039/d2nj03457c), 2022-01-01
Supplement: d2nj03457c1.pdf [file d2nj03457c1.pdf]

## Electronic Supplementary Information (ESI)

### Dark to Bright Fluorescence State by Inter-connecting Fluorophores:

#### Concentration Dependent Blue to NIR emission and Live Cell Imaging Application

Parthasarathy Gayathri,<sup>a</sup> Siva Bala Subramaniyan,<sup>a</sup> Anbazhagan Veerappan,<sup>a</sup> Anwarhussaini Syed,<sup>b</sup> Subbalakshmi Jayanty,<sup>b</sup> Mehboobali Pannipara,<sup>c,d</sup> Abdullah G. Al-Sehemi,<sup>c,d</sup> Dohyun Moon<sup>\*e</sup> Savarimuthu Philip Anthony<sup>\*a</sup>

<sup>a</sup>)School of Chemical & Biotechnology, SASTRA Deemed University, Thanjavur-613401, Tamil Nadu, India. Fax: +914362264120; Tel: +914362264101; E-mail: philip@biotech.sastra.edu

<sup>b</sup>) Department of Chemistry, Birla Institute of Technology and Science, Pilani-Hyderabad Campus, Hyderabad - 500078, India

<sup>b</sup>)Department of chemistry, King Khalid University, Abha 61413, Saudi Arabia.

<sup>c</sup>)Research center for Advanced Materials Science, King Khalid University, Abha 61413, Saudi Arabia.

<sup>b</sup>)Beamline Department, Pohang Accelerator Laboratory, 80 Jigokro-127beongil, Nam-gu, Pohang, Gyeongbuk, Korea, Email: dmoon@postech.ac.kr

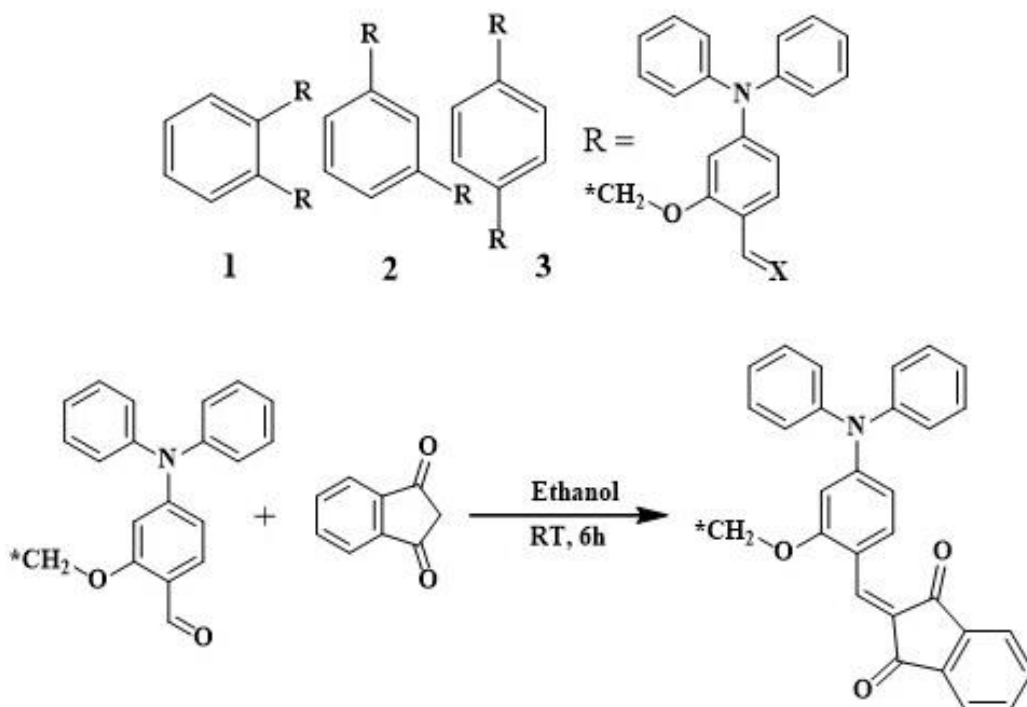

Scheme S1. Synthesis of isomers 1-3.

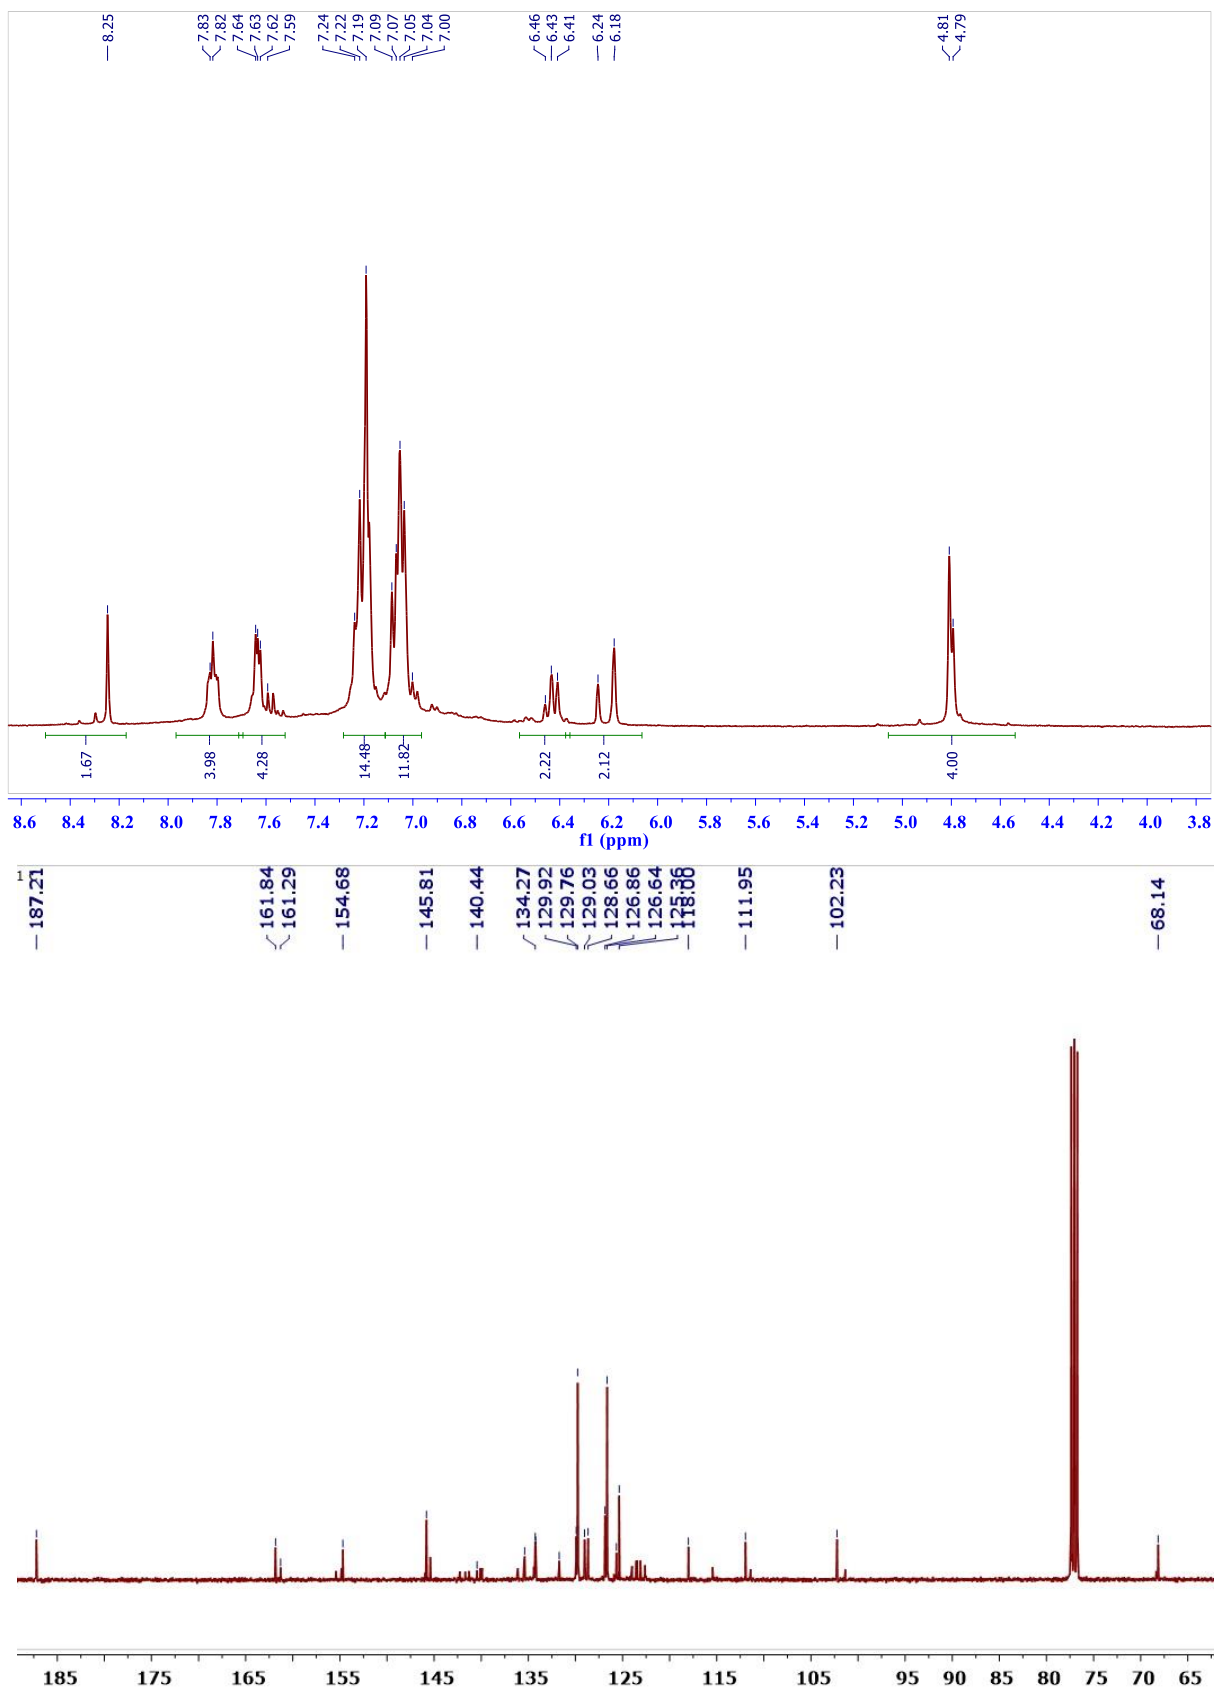

$^1\text{H}$  and  $^{13}\text{C}$  NMR of **1**.

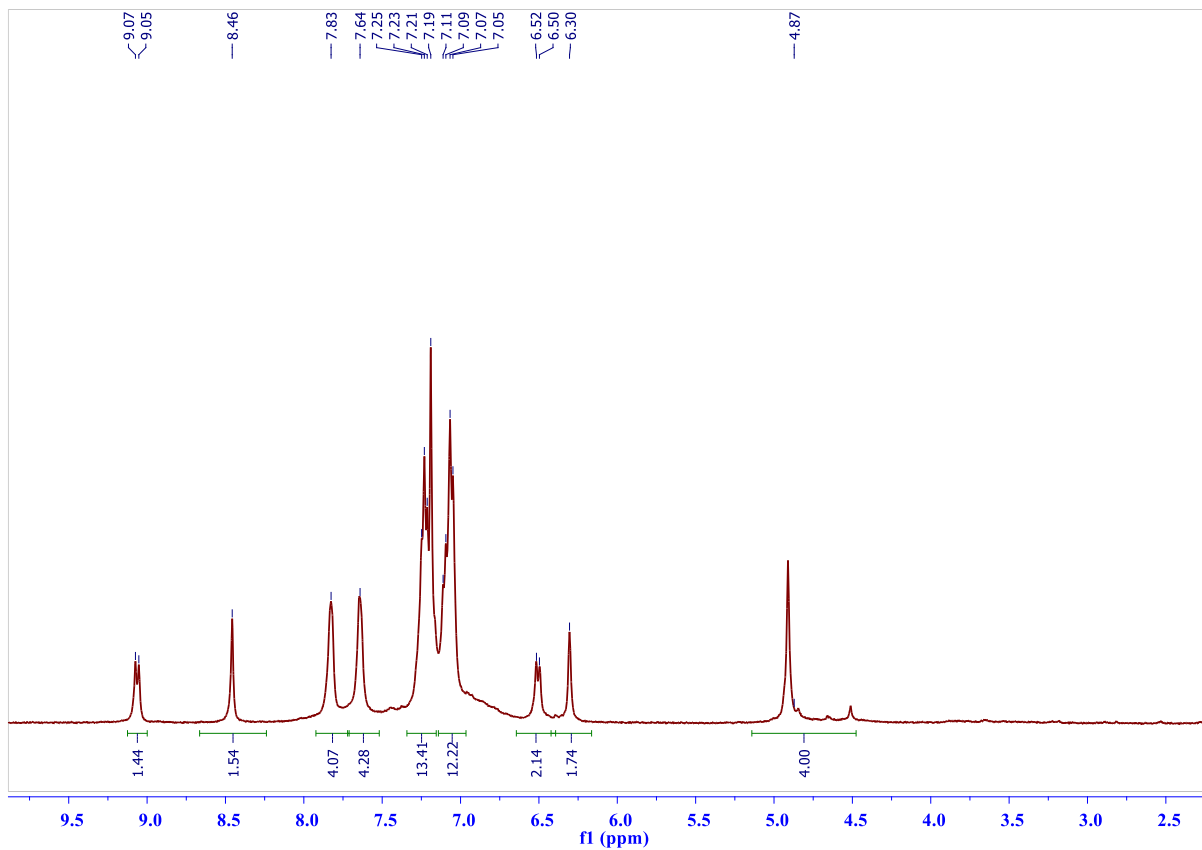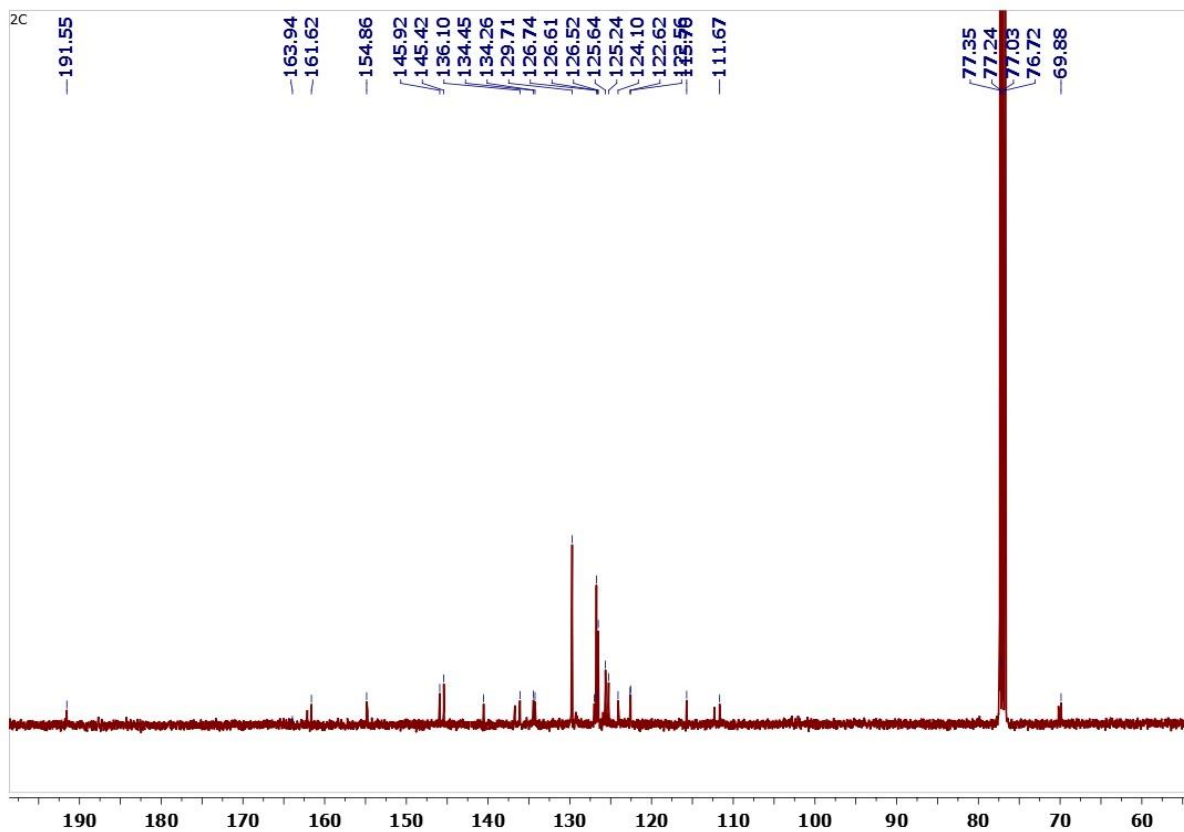

<sup>1</sup>H and <sup>13</sup>C NMR of 2.

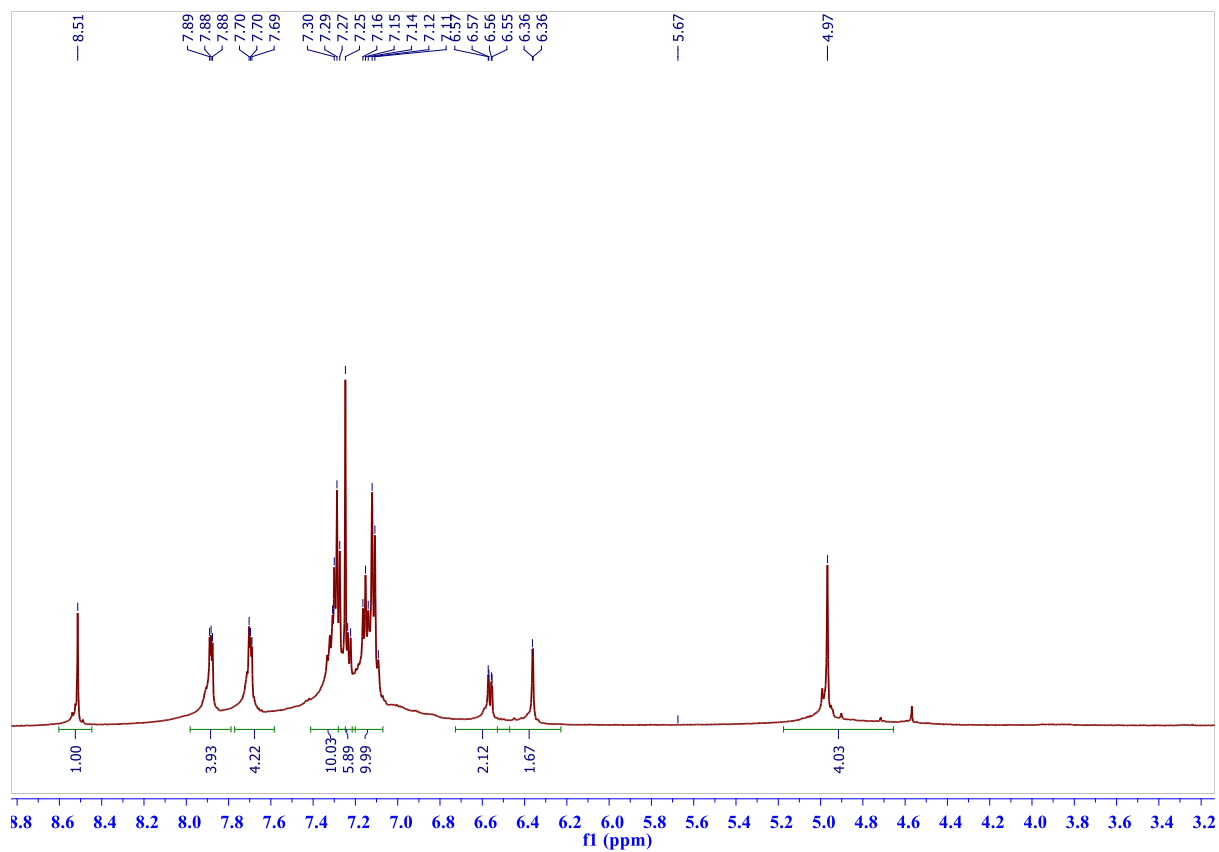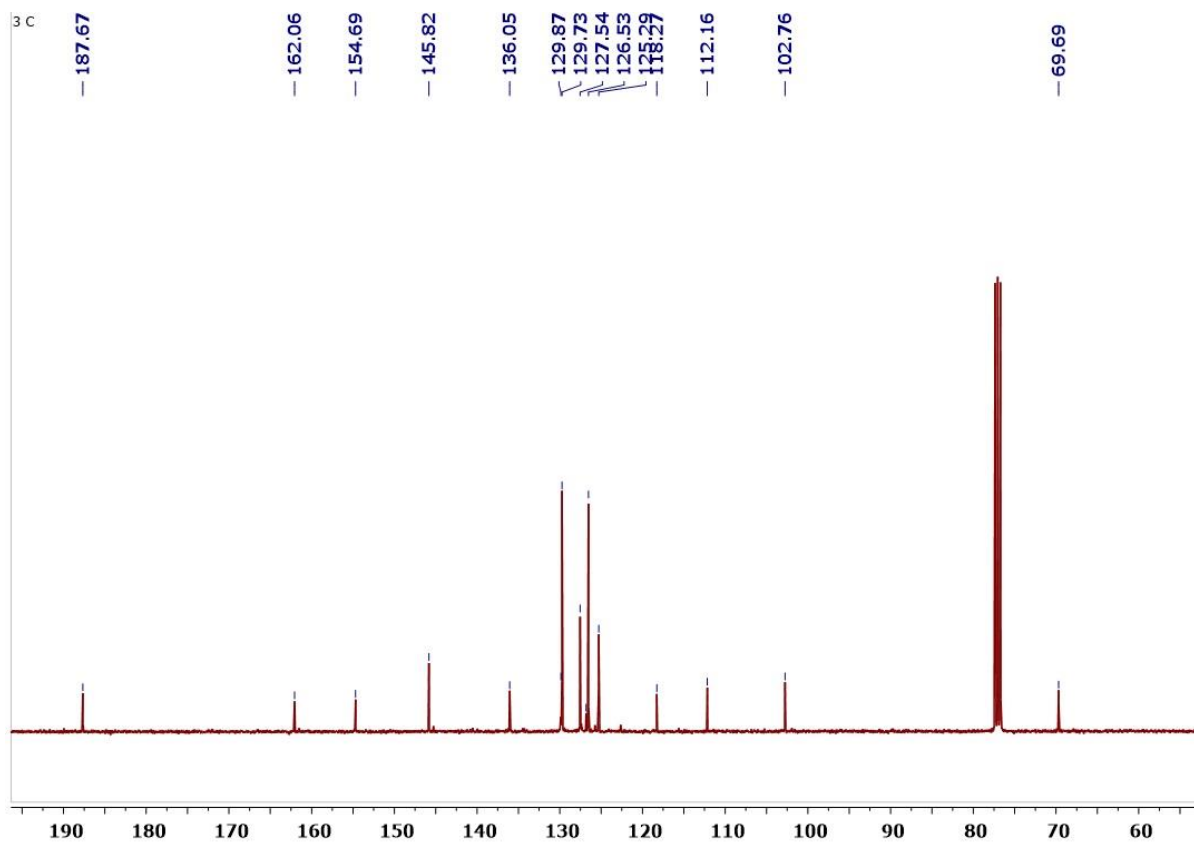

$^1\text{H}$  and  $^{13}\text{C}$  NMR of 3.

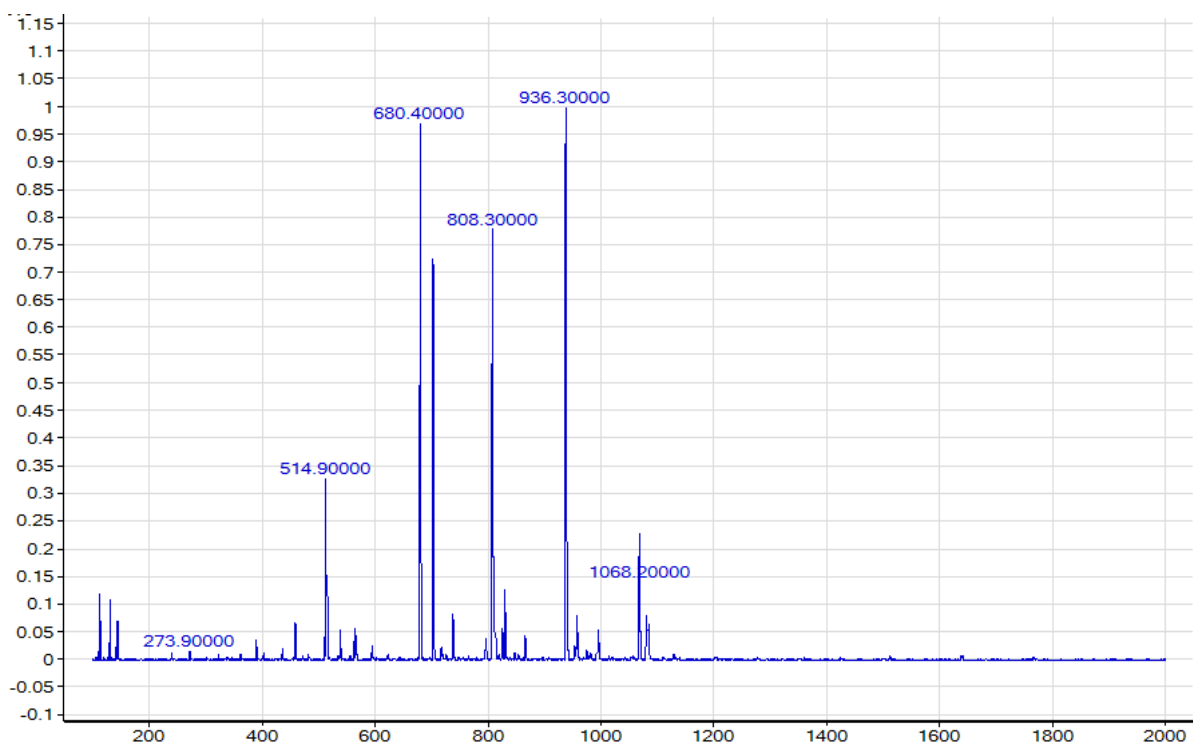

1: m/z calcd for  $C_{64}H_{44}N_2O_6$  (M + H): 936.32, found: 936.30.

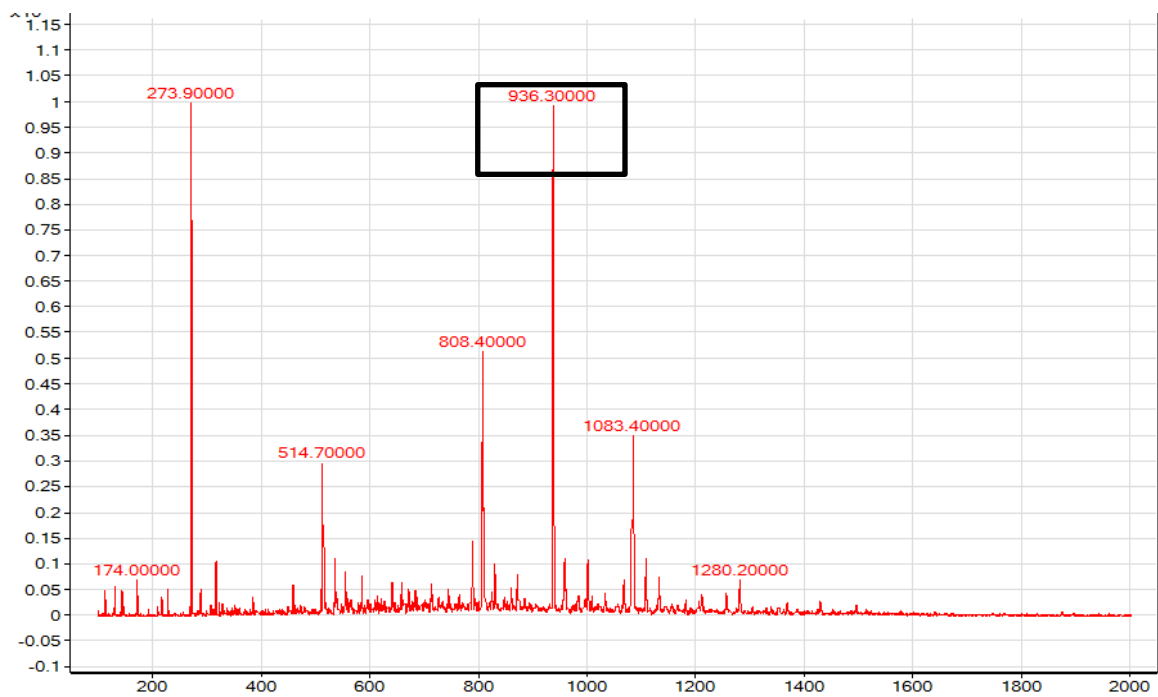

2: m/z calcd for  $C_{64}H_{44}N_2O_6$  (M + H): 936.32, found: 936.30.

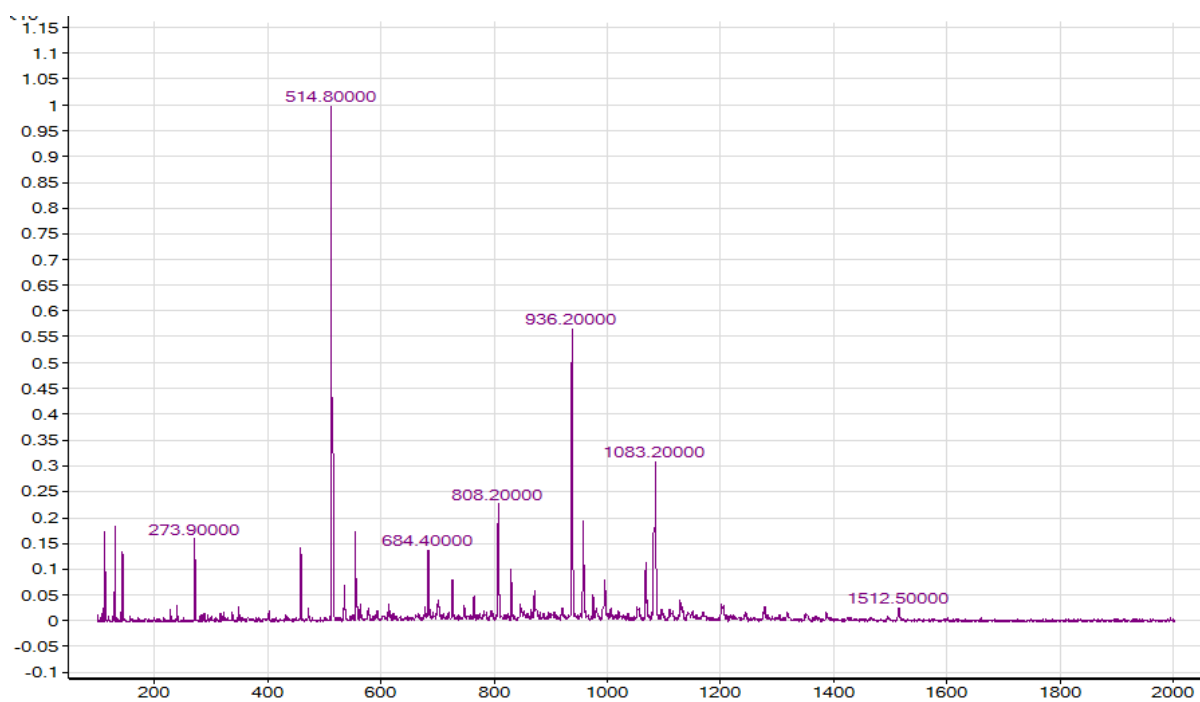

3: m/z calcd for  $C_{64}H_{44}N_2O_6$  (M + H): 936.32, found: 936.20.

Table S1. **1-3** fluorescence efficiency in solution compared to fluorescein.

| S.NO | Solvents           | Quantum yield ( $\Phi_F$ ) compared to Fluorescein |          |          |
|------|--------------------|----------------------------------------------------|----------|----------|
|      |                    | <b>1</b>                                           | <b>2</b> | <b>3</b> |
| 1    | CH <sub>3</sub> CN | 0.005                                              | 0.008    | 0.006    |
| 2    | CHCl <sub>3</sub>  | 0.047                                              | 0.078    | 0.074    |
| 3    | DMF                | 0.016                                              | 0.029    | 0.021    |
| 4    | DMSO               | 0.013                                              | 0.016    | 0.014    |
| 5    | Ethyl acetate      | 0.021                                              | 0.037    | 0.028    |
| 6    | Ethanol            | 0.005                                              | 0.004    | 0.003    |
| 7    | Methanol           | 0.002                                              | 0.001    | 0.001    |
| 8    | THF                | 0.021                                              | 0.045    | 0.060    |
| 9    | Toluene            | 0.089                                              | 0.090    | 0.085    |

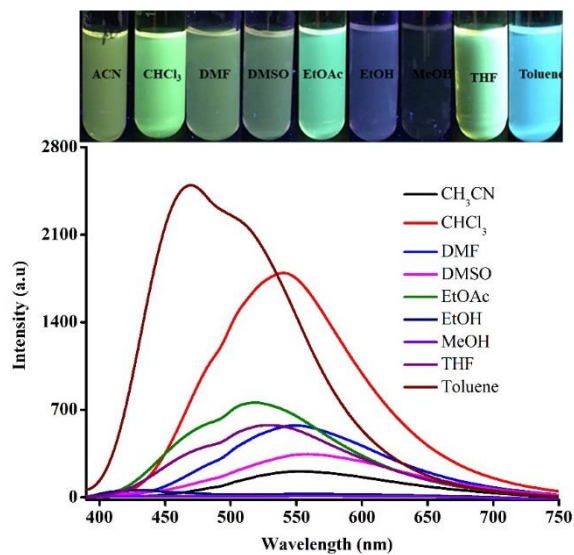

Figure S1. Digital images and fluorescence spectra of **3** in different solvents.

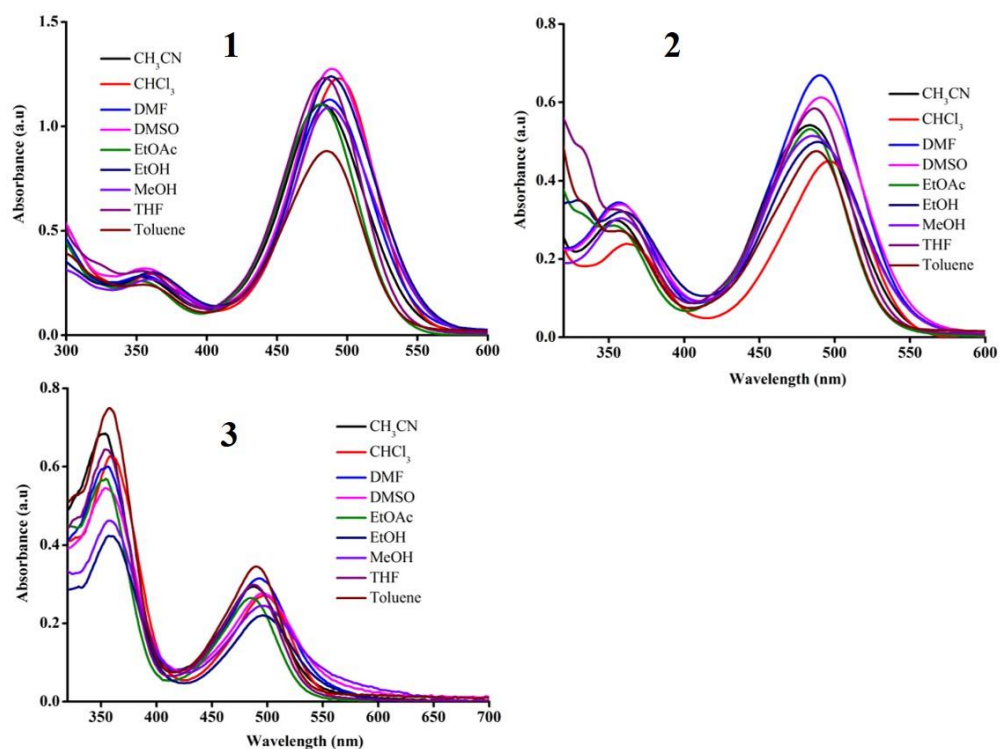

Figure S2. Absorption spectra of **1-3** in different solvents.

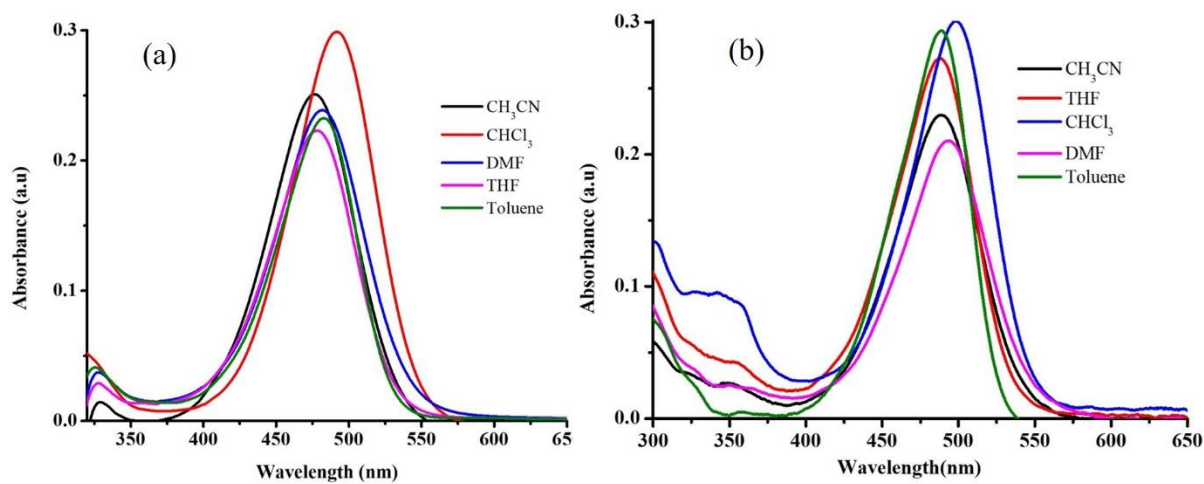

Figure S3. Absorption spectra of (a) TPA-indanedione and (b) 3-OCH<sub>3</sub>TPA-indanedione.



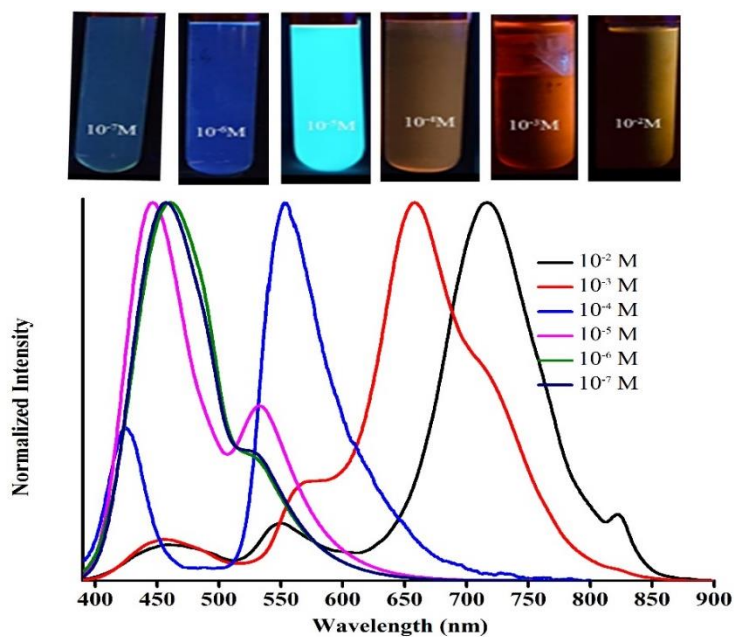

Figure S4. Concentration dependent fluorescence digital images and spectra of **2** ( $10^{-7} - 10^{-2}$  M) in  $\text{CHCl}_3$ .  $\lambda_{\text{exc}} = 365$  nm (for digital images) and 370 nm (for spectra).

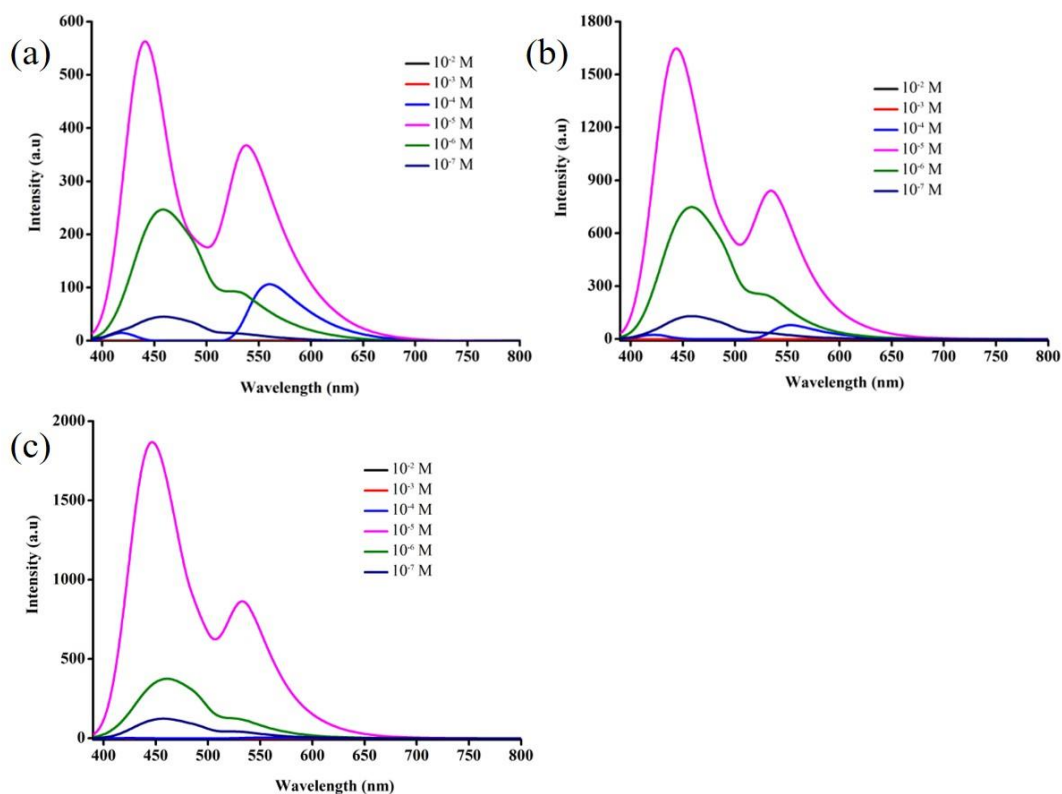

Figure S5. Concentration dependent fluorescence spectra of (a) **1**, (b) **2** and (c) **3** in  $\text{CHCl}_3$ .

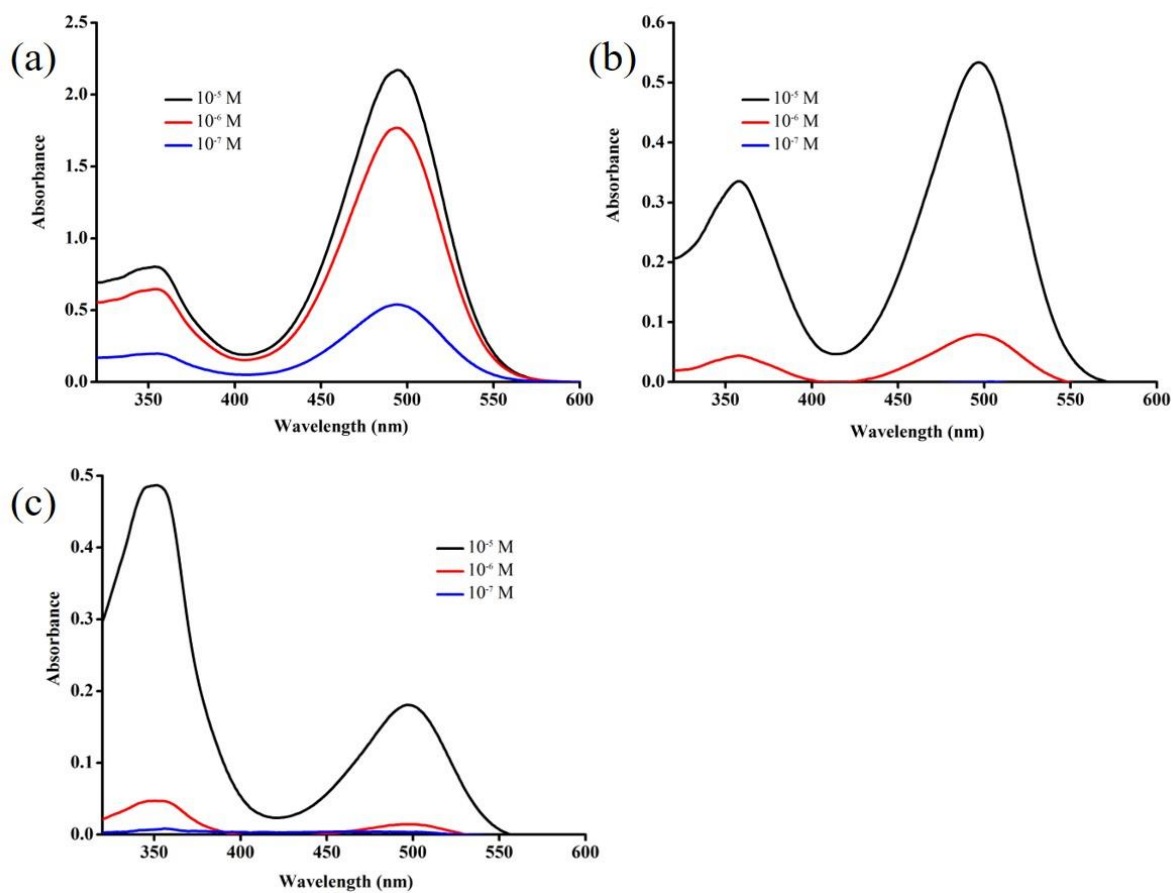

Figure S6. Concentration dependent absorption spectra of (a) **1**, (b) **2** and (c) **3** in  $\text{CHCl}_3$ .

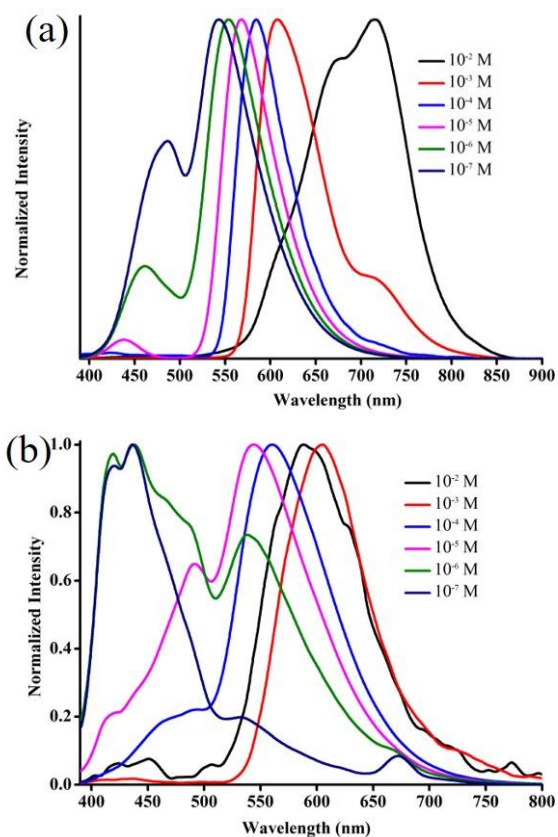

Figure S7. Concentration dependent fluorescence spectra of **1** in (a) THF and (b) DMSO.

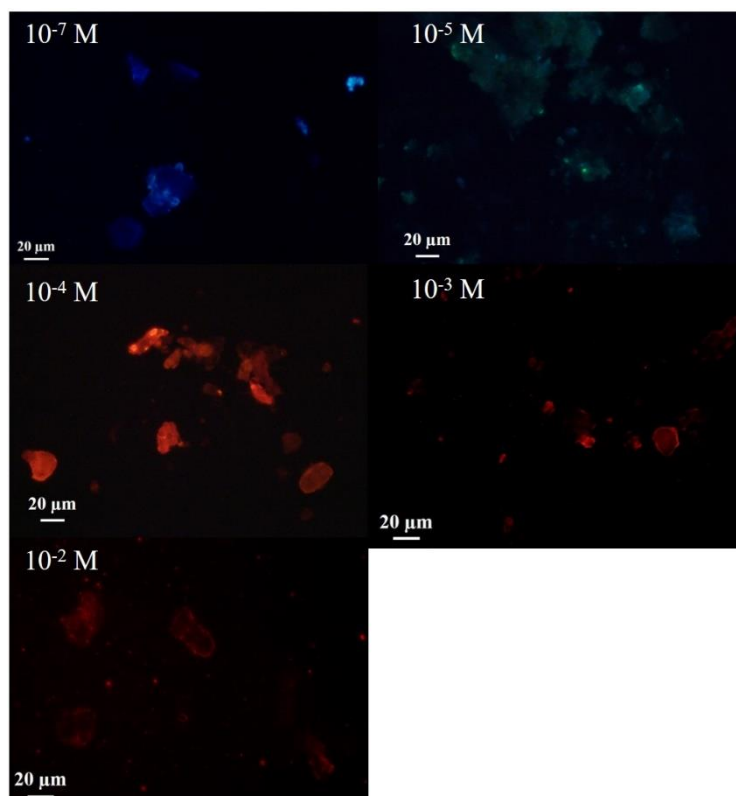

Figure S8. Confocal fluorescence microscopic images of **1**-PMMA composite thin films from different concentration.

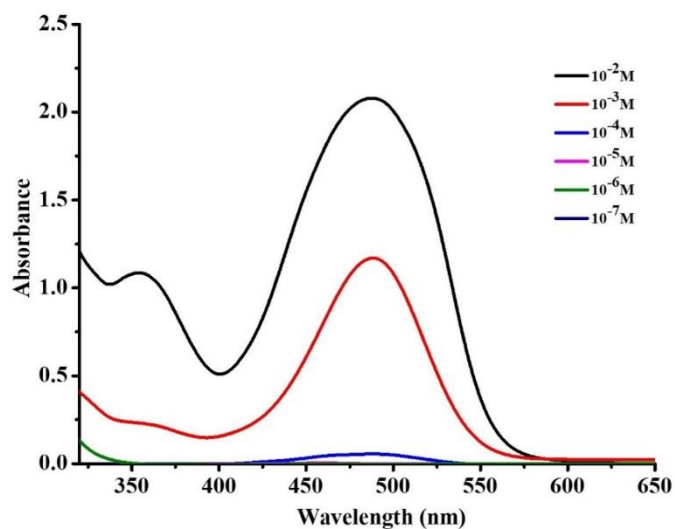

Figure S9. Concentration dependent absorption spectra of **1** in PMMA film.

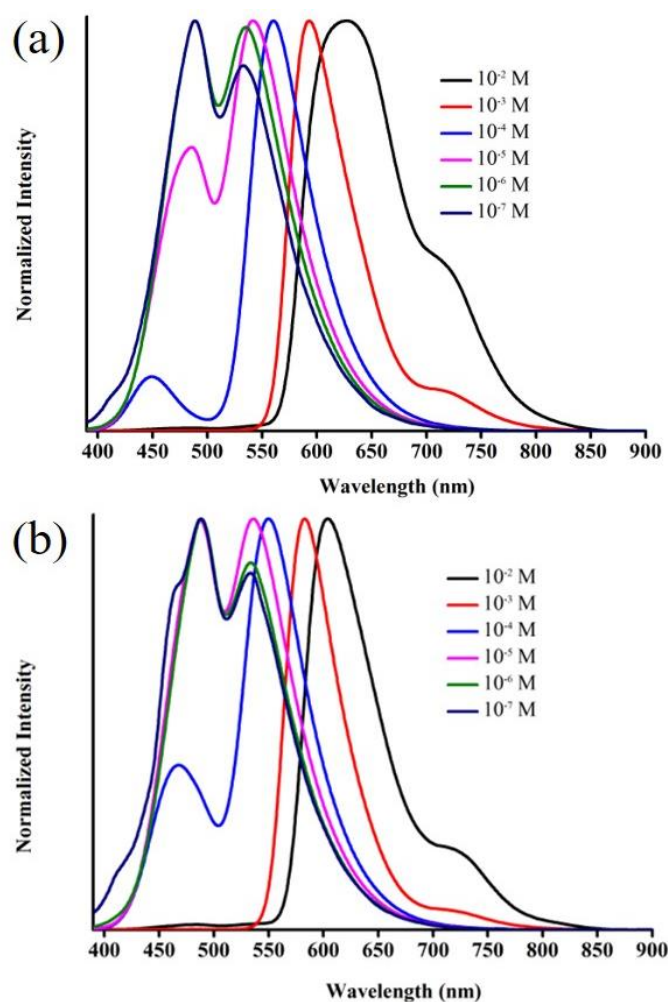

Figure S10. Concentration dependent fluorescence spectra of (a) **2** and (b) **3** in THF.

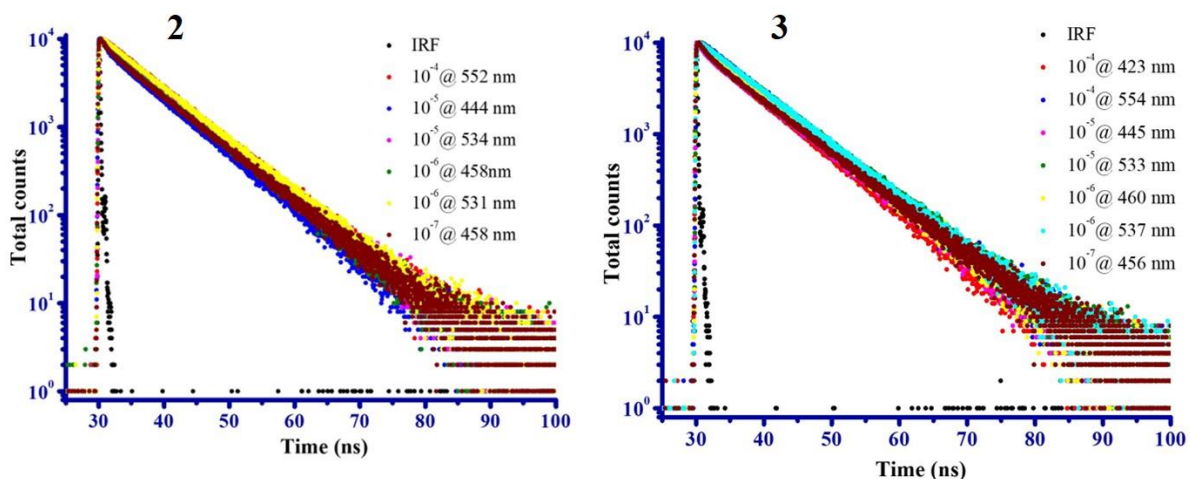

Fig. S11. Lifetime decay plot of **2** and **3** in  $\text{CHCl}_3$  from  $10^{-4}$  to  $10^{-7}$  M.

**Table S2.** Fluorescence lifetime data of **2** in  $\text{CHCl}_3$  at different concentration.

| Conc.     | $\lambda_{\text{em}}$<br>(nm) | B <sub>1</sub> (%) | B <sub>2</sub> (%) | $\tau_1$ (ns)     | $\tau_2$ (ns)     | $\chi^2$ |
|-----------|-------------------------------|--------------------|--------------------|-------------------|-------------------|----------|
| $10^{-4}$ | 552                           | 0.61               | 99.39              | $3.774 \pm 0.065$ | $7.240 \pm 0.033$ | 1.1      |
| $10^{-5}$ | 444                           | 5.83               | 94.17              | $0.97 \pm 0.061$  | $7.103 \pm 0.02$  | 1.02     |
| $10^{-5}$ | 534                           | 1.78               | 98.22              | $3.695 \pm 0.082$ | $7.226 \pm 0.034$ | 1.08     |
| $10^{-6}$ | 458                           | 4.36               | 95.64              | $1.16 \pm 0.091$  | $7.354 \pm 0.021$ | 1.11     |
| $10^{-6}$ | 531                           | 1.12               | 98.88              | $3.919 \pm 1.548$ | $7.421 \pm 0.038$ | 1.17     |
| $10^{-7}$ | 458                           | 4.81               | 95.19              | $1.073 \pm 0.080$ | $7.353 \pm 0.02$  | 1.06     |

**Table S3.** Fluorescence lifetime data of **3** in CHCl<sub>3</sub> at different concentration.

| Conc.            | $\lambda_{em}$<br>(nm) | B <sub>1</sub> (%) | B <sub>2</sub> (%) | $\tau_1$ (ns)     | $\tau_2$ (ns)    | $\chi^2$ |
|------------------|------------------------|--------------------|--------------------|-------------------|------------------|----------|
| 10 <sup>-4</sup> | 423                    | 4.57               | 95.43              | 1.009 ±<br>0.0822 | 7.298 ±<br>0.019 | 1.02     |
| 10 <sup>-4</sup> | 554                    | 2.7                | 97.3               | 3.803 ±<br>0.065  | 7.308 ±<br>0.034 | 1.14     |
| 10 <sup>-5</sup> | 445                    | 3.94               | 96.06              | 0.874 ±<br>0.069  | 7.558 ±<br>0.022 | 1.05     |
| 10 <sup>-5</sup> | 533                    | 0.82               | 99.18              | 3.966 ±<br>0.067  | 7.662 ±<br>0.035 | 1.07     |
| 10 <sup>-6</sup> | 460                    | 3.46               | 96.54              | 1.103 ±<br>0.114  | 7.554 ±<br>0.019 | 1.1      |
| 10 <sup>-6</sup> | 537                    | 10.13              | 89.87              | 6.670 ±<br>2.791  | 7.695 ±<br>0.189 | 1.13     |
| 10 <sup>-7</sup> | 456                    | 5.48               | 94.52              | 1.242 ±<br>0.072  | 7.691 ±<br>0.022 | 1.06     |

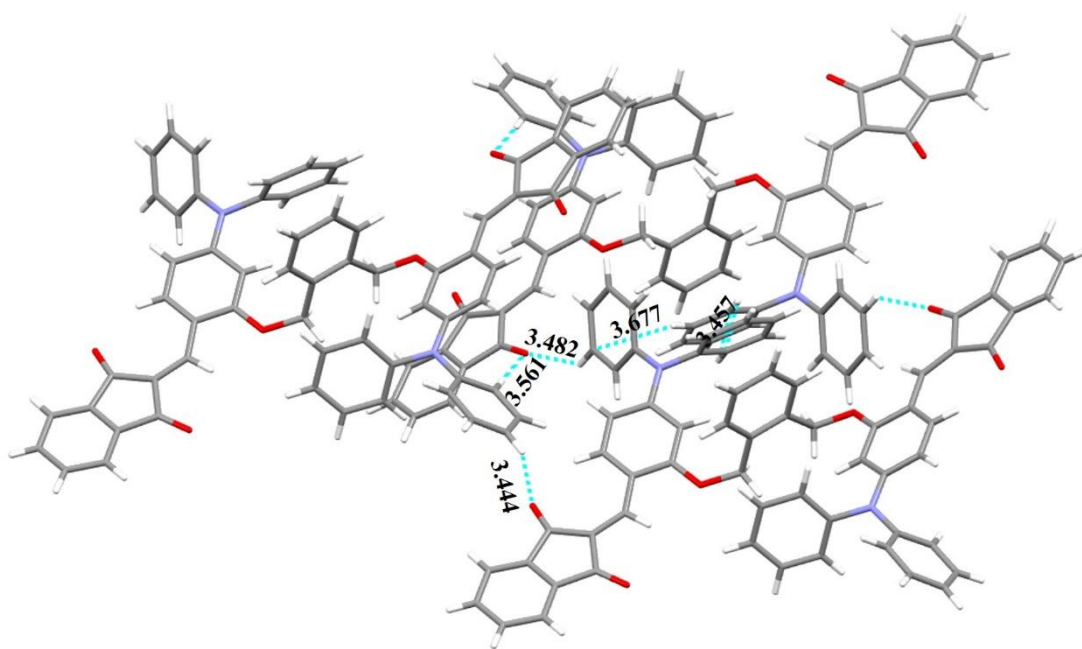

Fig. S12. Intermolecular interactions in the crystal lattice of **1**. C (grey), H (white), O (red) and N (blue). Dotted lines indicate the H-bonding and C-H... $\pi$  interactions in Å.

Table S4. Solid state fluorescence data of 1-3 and corresponding single AIEgen.

| <b>1</b>                    |              | <b>2</b>                    |              | <b>3</b>                    |              | <b>3-OMe-TPA</b>            |              |
|-----------------------------|--------------|-----------------------------|--------------|-----------------------------|--------------|-----------------------------|--------------|
| $\lambda_{\text{max}}$ (nm) | $\Phi_f$ (%) |
| 498,622,708                 | 2.3          | 434,536                     | 5.3          | 439,594                     | 4.0          | 611                         | 19.4         |

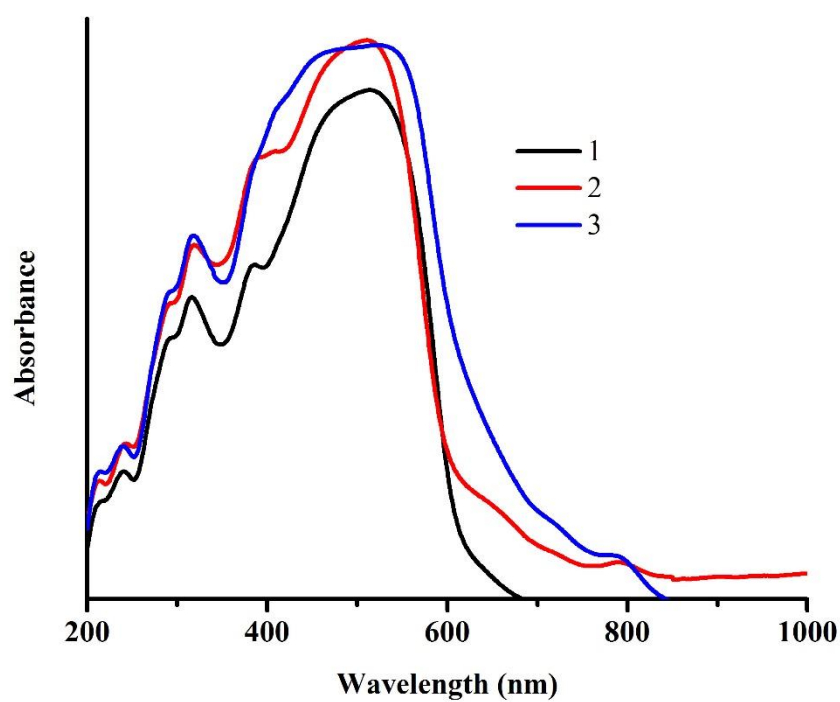

Figure S13. Solid state absorption spectra of 1-3.

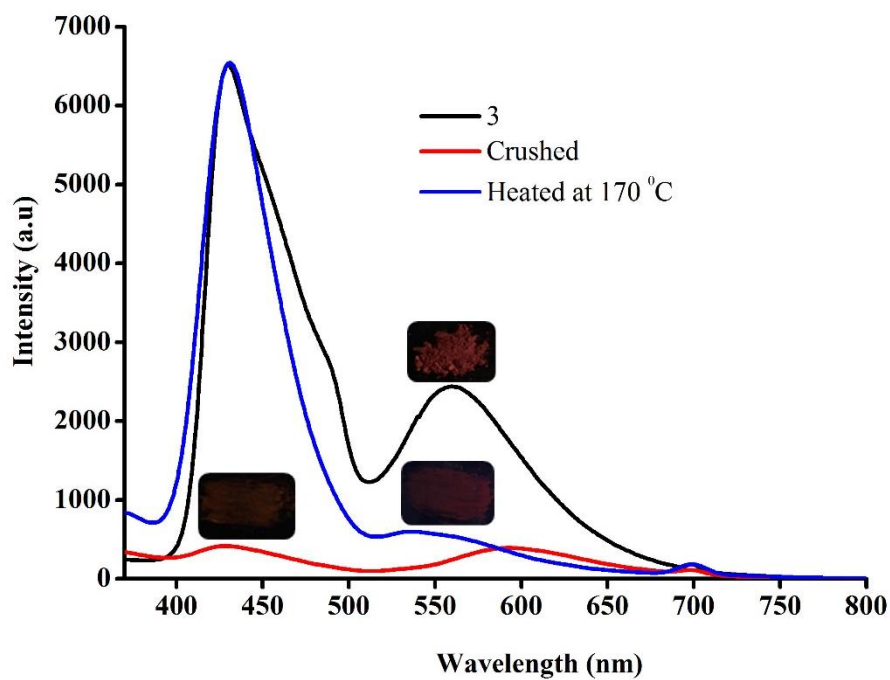

Figure S14. Mechanofluorochromism of **3**.

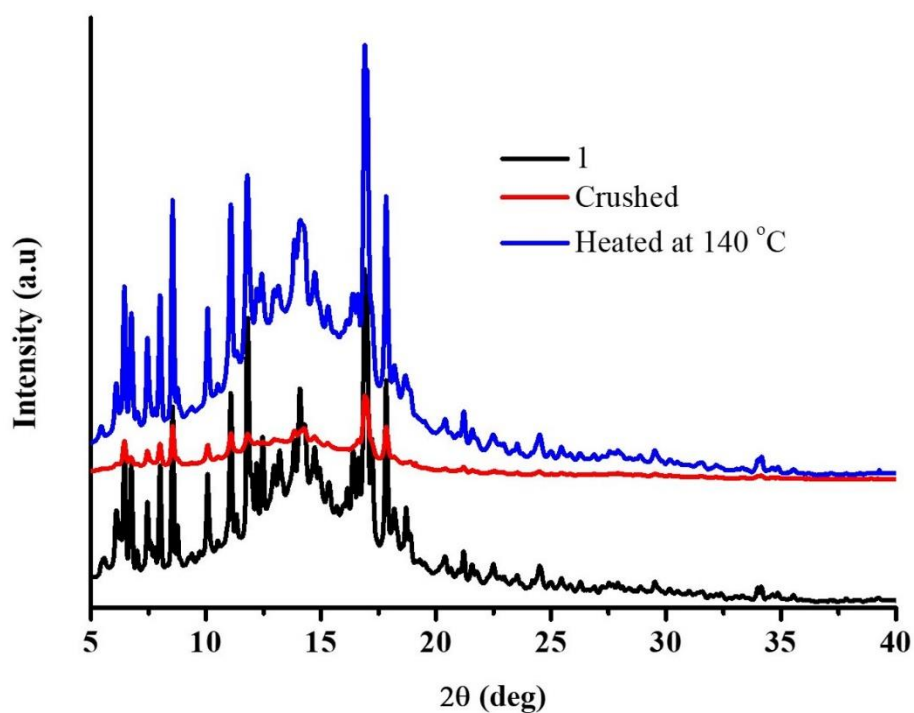

Figure S15. PXRD pattern of **1**.



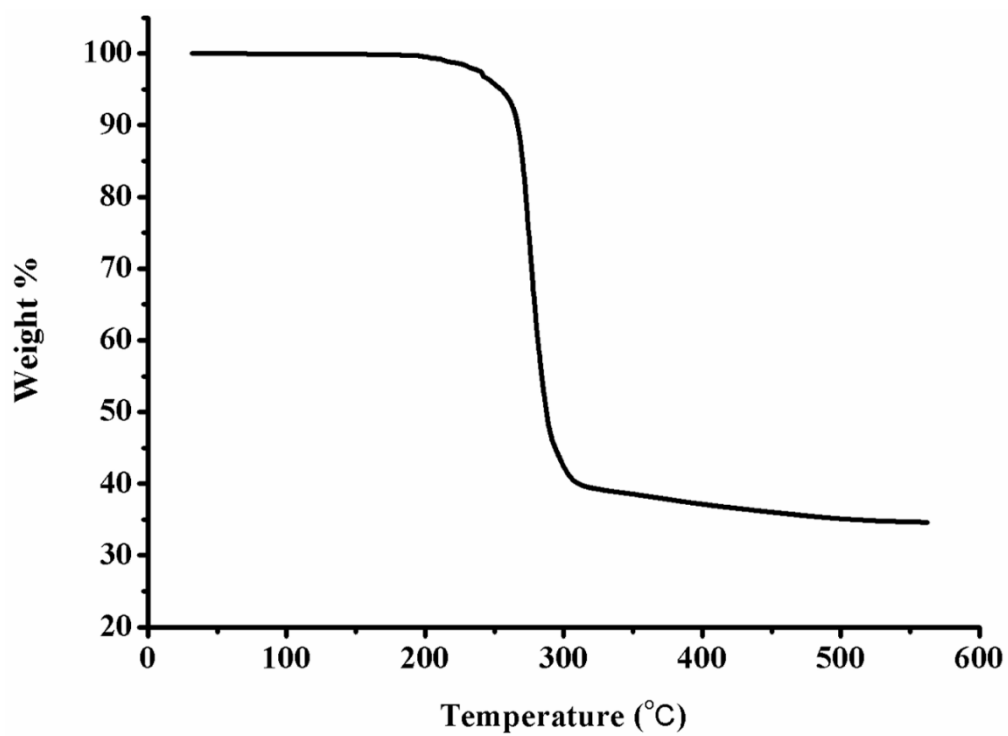

Figure S16. Thermogravimetric analysis of **1**.
